# Supplementary material for: Towards a greener synthesis of (S)-3-aminobutanoic acid: process development and environmental assessment
Source: Royal Society of Chemistry journal article supplement (doi:10.1039/c002721a), 2010-01-01

## Electronical Supporting Information (ESI)

### **Towards a greener synthesis of (S)-3-aminobutanoic acid: Process development and environmental assessment**

Markus Weiß, Tobias Brinkmann and Harald Gröger\*

#### **Table of Content**

**Table with material data used for the environmental assessment with the software programmes Umberto/Sabento**

**Table with ecotoxicity data used for the environmental assessment with the software programmes Umberto/Sabento**

#### **Environmental assessment of the optimized process (this work)**

- Extended mass balance

#### **Environmental assessment of the original process (published in: M. Weiß, H. Gröger, *Synlett* 2009, 1251-1254)**

- Extended mass balance
- Sankey diagram of Umberto/Sabento modelling
- Mass indices (in Kg) and PEI indices (in PEI/Kg) for the input materials
- Mass indices (in Kg) and PEI indices (in PEI/Kg) for the output materials
- Impact categories (input)
- Impact categories (ouptut)

## Table with material data used for the environmental assessment with the software programmes Umberto/Sabento

Table S1. Material data

| <i>Compound</i>                                                         | <i>CAS</i> | <i>R-Phrase</i>      | <i>S-Phrase</i>      | <i>Price<sup>a</sup> (17.10.2009)</i> | <i>Amount (supplier)</i> | <i>Price per kg</i> | <i>Density [g/cm<sup>3</sup>]</i> |
|-------------------------------------------------------------------------|------------|----------------------|----------------------|---------------------------------------|--------------------------|---------------------|-----------------------------------|
| ( <i>E</i> )-Ethyl but-2-enoate, <b>1</b>                               | 623-70-1   | 11-34                | 16-26-36/37/39-45    | 5,60 €                                | 0,5 L (Acros)            | 10,60 €             | 0,918                             |
| Benzylamine, <b>2</b>                                                   | 100-46-9   | 21/22-34             | 26-36/37/39-45       | 10,80 €                               | 2,5 L (Acros)            | 4,40 €              | 0,981                             |
| Methyl <i>tert</i> -butyl ether                                         | 1634-04-4  | 11-38                | 9-16-24              | 17,30 €                               | 25,0 L (Acros)           | 0,93 €              | 0,74                              |
| Ethyl 3-(benzylamino)butanoate, <b>3</b>                                | -          | -                    | -                    | -                                     | -                        | -                   | -                                 |
| Ethanol                                                                 | 64-17-5    | 11                   | 7-16                 | 15,60 €                               | 25,0 L (Acros)           | 0,80 €              | 0,785                             |
| Benzyl ( <i>R</i> )-3-(benzylamino)butanamide, ( <i>R</i> )- <b>4</b>   | -          | -                    | -                    | -                                     | -                        | -                   | -                                 |
| Benzyl ( <i>E</i> )-but-2-enamide, <b>7</b>                             | -          | -                    | -                    | -                                     | -                        | -                   | -                                 |
| CAL-B                                                                   | 9001-62-1  | -                    | -                    | 14,70 €                               | 10 g (Sigma)             | 1.470,00 €          | -                                 |
| Sodium hydroxide                                                        | 1310-73-2  | 35                   | 26-37/39-45          | 22,80 €                               | 25 kg (Acros)            | 0,91 €              | -                                 |
| NaOH (1M aq.)                                                           | 1310-73-2  | 34                   | 26-37/39-45          | 12,90 €                               | 10 L (Sigma)             | 1,29 €              | 1,04                              |
| Pd(C)                                                                   | -          | 11-36/37/38          | 14-22                | 28,50 €                               | 50 g (Sigma)             | 570,00 €            | -                                 |
| Sodium ( <i>S</i> )-3-(benzylamino)butanoate, ( <i>S</i> )- <b>8</b>    | -          | -                    | -                    | -                                     | -                        | -                   | -                                 |
| ( <i>S</i> )-3-Aminobutanoic acid hydrochloride, ( <i>S</i> )- <b>9</b> | 58610-41-6 | -                    | -                    | 54,90 €                               | 1 g (Sigma)              | 54.900,00 €         | -                                 |
| Toluene                                                                 | 108-88-3   | 11-38-48/20-63-65-67 | 36/37-46-62          | 12,60 €                               | 25,0 L (Acros)           | 0,58 €              | 0,86                              |
| Sodium chloride                                                         | 7647-14-5  | -                    | -                    | 12,30 €                               | 25 kg (Acros)            | 0,50 €              | -                                 |
| HCl (1M aq.)                                                            | 7647-01-0  | 34-37                | 24/25                | 4,20 €                                | 2,5 L (Acros)            | 1,70 €              | 1,02                              |
| Hydrogen                                                                | 1333-74-0  | 12                   | 9-16-33              | 18,70 €                               | 56 L (Sigma)             | 37.400,00 €         | 0,09                              |
| Merck-III ion exchanger                                                 | -          | -                    | -                    | 61,90 €                               | 5 kg (Merck)             | 12,90 €             | -                                 |
| 2-Propanol                                                              | 67-63-0    | 11-36-67             | 7-16-24/25-26        | 19,70 €                               | 25 L (Acros)             | 0,78 €              | 0,78                              |
| Diethylamine                                                            | 109-89-7   | 11-20/21/22-35       | 16-26-29-36/37/39-45 | 3,50 €                                | 2,5 L (Acros)            | 1,40 €              | 0,71                              |
| Silica 60 (for column chromatography)                                   | 7631-86-9  | 36/37                | 12-36/37/39          | 131,12 €                              | 30 kg (Acros)            | 4,40 €              | 1,356                             |
| Ammonia solution (0.25M aq.)                                            | 1336-21-6  | 36/37/38             | 26-36                | 135,00 €                              | 2 L (Acros)              | 7,30 €              | 0,92                              |
| Pd(OH) <sub>2</sub> 10-20% on activated charcoal                        | -          | 36/37/38             | 26-36                | 59,70 €                               | 50 g (Sigma)             | -                   | -                                 |
| Dowex-50-WX8 ion exchanger                                              | 11119-67-8 | 36/37/38             | 26-36                | 20 €                                  | 500 g (Acros)            | -                   | -                                 |
| ( <i>S</i> )-3-Aminobutanoic acid, ( <i>S</i> )- <b>5</b>               | 541-48-0   | 36/37/38             | 26                   | -                                     | -                        | -                   | -                                 |

<sup>a</sup> Indicated prices are lab chemicals catalogue prices which were divided by a factor of 10 (in analogy to an economic consideration in: M. Beller, A. Zapf, W. Mägerlein, *Chem. Eng. Technol.* **2001**, *24*, 575-582.).

**Table with ecotoxicity data used for the environmental assessment with the software programmes Umberto/Sabento**

**Table 2.** Ecotoxicological data

| <i>Compound</i>                                                         | <i>MAK [g/m<sup>3</sup>]</i> | <i>Risk symbol</i> | <i>Acute Toxicity [mg/kg]</i> | <i>Impact</i> | <i>Cancer</i> | <i>Mutagenic</i> | <i>Teratogenic</i> | <i>WKG</i> | <i>Impact</i>                    | <i>Conc.[mg/l]</i> | <i>Degredation (aerob)</i> | <i>Degredation (anaerob)</i> |
|-------------------------------------------------------------------------|------------------------------|--------------------|-------------------------------|---------------|---------------|------------------|--------------------|------------|----------------------------------|--------------------|----------------------------|------------------------------|
| ( <i>E</i> )-Ethyl but-2-enoate, <b>1</b>                               | -                            | F, Xi              | 3000 (rat)                    | oral          | -             | -                | -                  | 2          | -                                | -                  | -                          | -                            |
| Benzylamine, <b>2</b>                                                   | -                            | C                  | 552 (rat)                     | oral          | -             | -                | -                  | 1          | Daphnia (48h)                    | 60                 | -                          | -                            |
| Methyl <i>tert</i> -butyl ether                                         | 180                          | F, Xi              | 4000 (rat)                    | oral          | 3             | -                | -                  | 1          | Fish (Pimephales promelas) (96h) | 672                | 28 days                    | 112 days                     |
| Ethyl 3-(benzylamino)butanoate, <b>3</b>                                | -                            | -                  | -                             | -             | -             | -                | -                  | -          | -                                | -                  | -                          | -                            |
| Ethanol                                                                 | 960                          | F                  | 7060 (rat)                    | oral          | -             | -                | -                  | -          | Daphnia (48h)                    | 9,3                | 26 hours                   | 104 hours                    |
| Benzyl ( <i>R</i> )-3-(benzylamino)butanamide, ( <i>R</i> )- <b>4</b>   | -                            | -                  | -                             | -             | -             | -                | -                  | -          | -                                | -                  | -                          | -                            |
| Benzyl ( <i>E</i> )-but-2-enamide, <b>7</b>                             | -                            | -                  | -                             | -             | -             | -                | -                  | -          | -                                | -                  | -                          | -                            |
| CAL-B                                                                   | -                            | -                  | -                             | -             | -             | -                | -                  | -          | -                                | -                  | -                          | -                            |
| Sodium hydroxide                                                        | -                            | C                  | 500 (rat)                     | oral          | -             | -                | -                  | 1          | Daphnia (48h)                    | 40,38              | -                          | -                            |
| NaOH (1M aq.)                                                           | 2                            | C                  | 40 (rat)                      | oral          | -             | -                | -                  | 1          | -                                | -                  | -                          | -                            |
| Pd(C)                                                                   | -                            | Xi                 | -                             | -             | -             | -                | -                  | 0          | -                                | -                  | -                          | -                            |
| Sodium ( <i>S</i> )-3-(benzylamino)butanoate, ( <i>S</i> )- <b>8</b>    | -                            | -                  | -                             | -             | -             | -                | -                  | -          | -                                | -                  | -                          | -                            |
| ( <i>S</i> )-3-Aminobutanoic acid hydrochloride, ( <i>S</i> )- <b>9</b> | -                            | -                  | -                             | -             | -             | -                | -                  | 3          | -                                | -                  | -                          | -                            |
| Toluene                                                                 | 190                          | F, Xn              | 5580 (rat)                    | oral          | 3             | -                | -                  | 2          | Daphnia (48h)                    | 8                  | 4 days                     | 8 weeks                      |
| Sodium chloride                                                         | -                            | -                  | 3000 (rat)                    | oral          | -             | -                | -                  | 1          | Daphnia (48h)                    | 1661               | -                          | -                            |
| HCl (1M aq.)                                                            | 8                            | C                  | 2857 (rat)                    | oral          | -             | -                | -                  | 1          | -                                | -                  | -                          | -                            |
| Hydrogen                                                                | -                            | F+                 | -                             | -             | -             | -                | -                  | -          | -                                | -                  | -                          | -                            |
| Merck-III ion exchanger                                                 | -                            | -                  | -                             | -             | -             | -                | -                  | 1          | -                                | -                  | -                          | -                            |
| 2-Propanol                                                              | 500                          | Xi, F              | 5045 (rat)                    | oral          | -             | -                | -                  | 1          | Fish (Pimephales promelas) (96h) | 9640               | 168 hours                  | 672 hours                    |
| Diethylamine                                                            | 15                           | F, C               | 540 (rat)                     | oral          | -             | -                | -                  | 1          | Daphnia (48h)                    | 56                 | -                          | -                            |
| Silica 60 (for column chromatography)                                   | -                            | -                  | >5000 (rat)                   | oral          | -             | -                | -                  | 0          | Daphnia (48h)                    | 10000              | -                          | -                            |
| Ammonia solution (0.25M aq.)                                            | -                            | C                  | -                             | -             | -             | -                | -                  | 1          | -                                | -                  | -                          | -                            |
| Pd(OH) <sub>2</sub> 10-20% on activated charcoal                        | -                            | Xi                 | -                             | -             | -             | -                | -                  | 3          | -                                | -                  | -                          | -                            |
| Dowex-50-WX8 ion exchanger                                              | -                            | Xi                 | -                             | -             | -             | -                | -                  | 0          | -                                | -                  | -                          | -                            |
| ( <i>S</i> )-3-Aminobutanoic acid, ( <i>S</i> )- <b>5</b>               | -                            | Xi                 | -                             | -             | -             | -                | -                  | 3          | -                                | -                  | -                          | -                            |

## Environmental assessment of the optimized process (this work)

### - Extended mass balance

**Table S3.** Extended mass balance<sup>a</sup> of new process

| Input                                     | Quantity [kg] | Output                                                                                   | Quantity [kg] |
|-------------------------------------------|---------------|------------------------------------------------------------------------------------------|---------------|
| Hydrogen                                  | 0.0708        | Hydrogen                                                                                 | 0.0569        |
| NaOH (0.1M)                               | 0.2531        | NaOH (0.1M)                                                                              | 0.2531        |
| NaOH (1M)                                 | 2.0632        | NaOH (1M)                                                                                | 1.7341        |
| NaOH (2M)                                 | 3.9236        | NaOH (2M)                                                                                | 3.0506        |
| Methyl <i>tert</i> -Butylether            | 1.8734        | Methyl <i>tert</i> -Butylether                                                           | 1.8734        |
| CAL-B                                     | 0.1898        | CAL-B                                                                                    | 0.1898        |
| Benzylamine, <b>2</b>                     | 5.9620        | Benzylamine, <b>2</b>                                                                    | 1.8101        |
| Ethyl ( <i>E</i> )-but-2-enoate, <b>1</b> | 2.8860        | Ethanol (coupling product)                                                               | 1.0506        |
| NaHCO <sub>3</sub>                        | 0.3645        | Benzyl ( <i>R</i> )-3-(benzylamino)butanamide, ( <i>R</i> )- <b>4</b> (coupling product) | 4.0886        |
| HCl (used for work-up, 1M)                | 10.5696       | Toluene (side product)                                                                   | 0.6594        |
| HCl (used for reaction, 1M)               | 1.5949        | Sodium ( <i>S</i> )-3-(benzylamino)butanoate (waste, unreacted), ( <i>S</i> )- <b>8</b>  | 0.2784        |
| Water                                     | 11.7721       | Benzyl ( <i>E</i> )-but-2-enamide (side product), <b>7</b>                               | 0.3037        |
|                                           |               | Inorganic salts                                                                          | 2.8328        |
|                                           |               | HCl (1M)                                                                                 | 10.5696       |
|                                           |               | Water                                                                                    | 11.7721       |
|                                           |               | ( <i>S</i> )-3-Amino butanoic acid hydrochloride, ( <i>S</i> )- <b>9</b>                 | 1.0           |
| Total                                     | 41.5232       | Total                                                                                    | 41.5232       |

<sup>a</sup> mass balance calculated by Umberto 5.5 for the hypothetical production of 1 kg (*S*)-3-amino butanoic acid hydrochloride, (*S*)-**9**

## Environmental assessment of the original process (published in: M. Weiß, H. Gröger, *Synlett* 2009, 1251-1254)

### - Extended mass balance

**Table S4.** Mass balance<sup>a</sup> of original process

| Input                                     | Quantity [kg] | Output                                                                                   | Quantity [kg] |
|-------------------------------------------|---------------|------------------------------------------------------------------------------------------|---------------|
| Hydrogen                                  | 0.1124        | Hydrogen                                                                                 | 0.0903        |
| Ethyl acetate                             | 204.9450      | Ethanol                                                                                  | 1.6998        |
| 2-Propanol                                | 102.4725      | Ethylacetate                                                                             | 204.9450      |
| Methyl <i>tert</i> -butyl ether           | 2.9737        | 2-Propanol                                                                               | 102.4725      |
| CAL-B                                     | 0.3013        | Methyl <i>tert</i> -butyl ether                                                          | 2.9737        |
| Ammonia (1M aq.)                          | 3.3132        | ( <i>S</i> )-3-Amino butanoic acid hydrochloride, ( <i>S</i> )- <b>9</b> (unreacted)     | 0.6365        |
| Benzylamine, <b>2</b>                     | 9.4636        | CAL-B                                                                                    | 0.3013        |
| Diethylamine                              | 0.1687        | Ammonia (1M aq.)                                                                         | 5.0200        |
| Acetic acid                               | 2.5100        | Benzylamine                                                                              | 2.8732        |
| Ethyl ( <i>E</i> )-but-2-enoate, <b>1</b> | 4.5811        | Diethylamine                                                                             | 0.1687        |
| HCl (aq.)                                 | 4.6371        | Acetic acid                                                                              | 2.5100        |
| Water                                     | 23.9524       | Benzyl ( <i>R</i> )-3-(benzylamino)butanamide, ( <i>R</i> )- <b>4</b> (coupling product) | 6.4899        |
|                                           |               | Toluene (side product)                                                                   | 1.3072        |
|                                           |               | Benzyl ( <i>E</i> )-but-2-enamide, <b>7</b> (side product)                               | 0.4822        |
|                                           |               | HCl (aq.)                                                                                | 4.4703        |
|                                           |               | Water                                                                                    | 21.9904       |
|                                           |               | ( <i>S</i> )-3-Amino butanoic acid, ( <i>S</i> )- <b>5</b>                               | 1.0           |
| Total                                     | 359.4310      | Total                                                                                    | 359.4310      |

<sup>a</sup> mass balance calculated by Umberto 5.5 for the hypothetical production of 1 kg (*S*)-3-amino butanoic acid, (*S*)-**5**; following regeneration rates are assumed for the calculation: organic solvents (90%), organic solvent mixtures (85%), water and aqueous solvents (90%), CAL-B (85%), chemical catalysts (100%), silica (300 g) for column chromatography (100%); 300 g 2-PrOH were assumed for the regeneration of silica (300 g).

- Sankey diagram of the Umberto/Sabento modelling

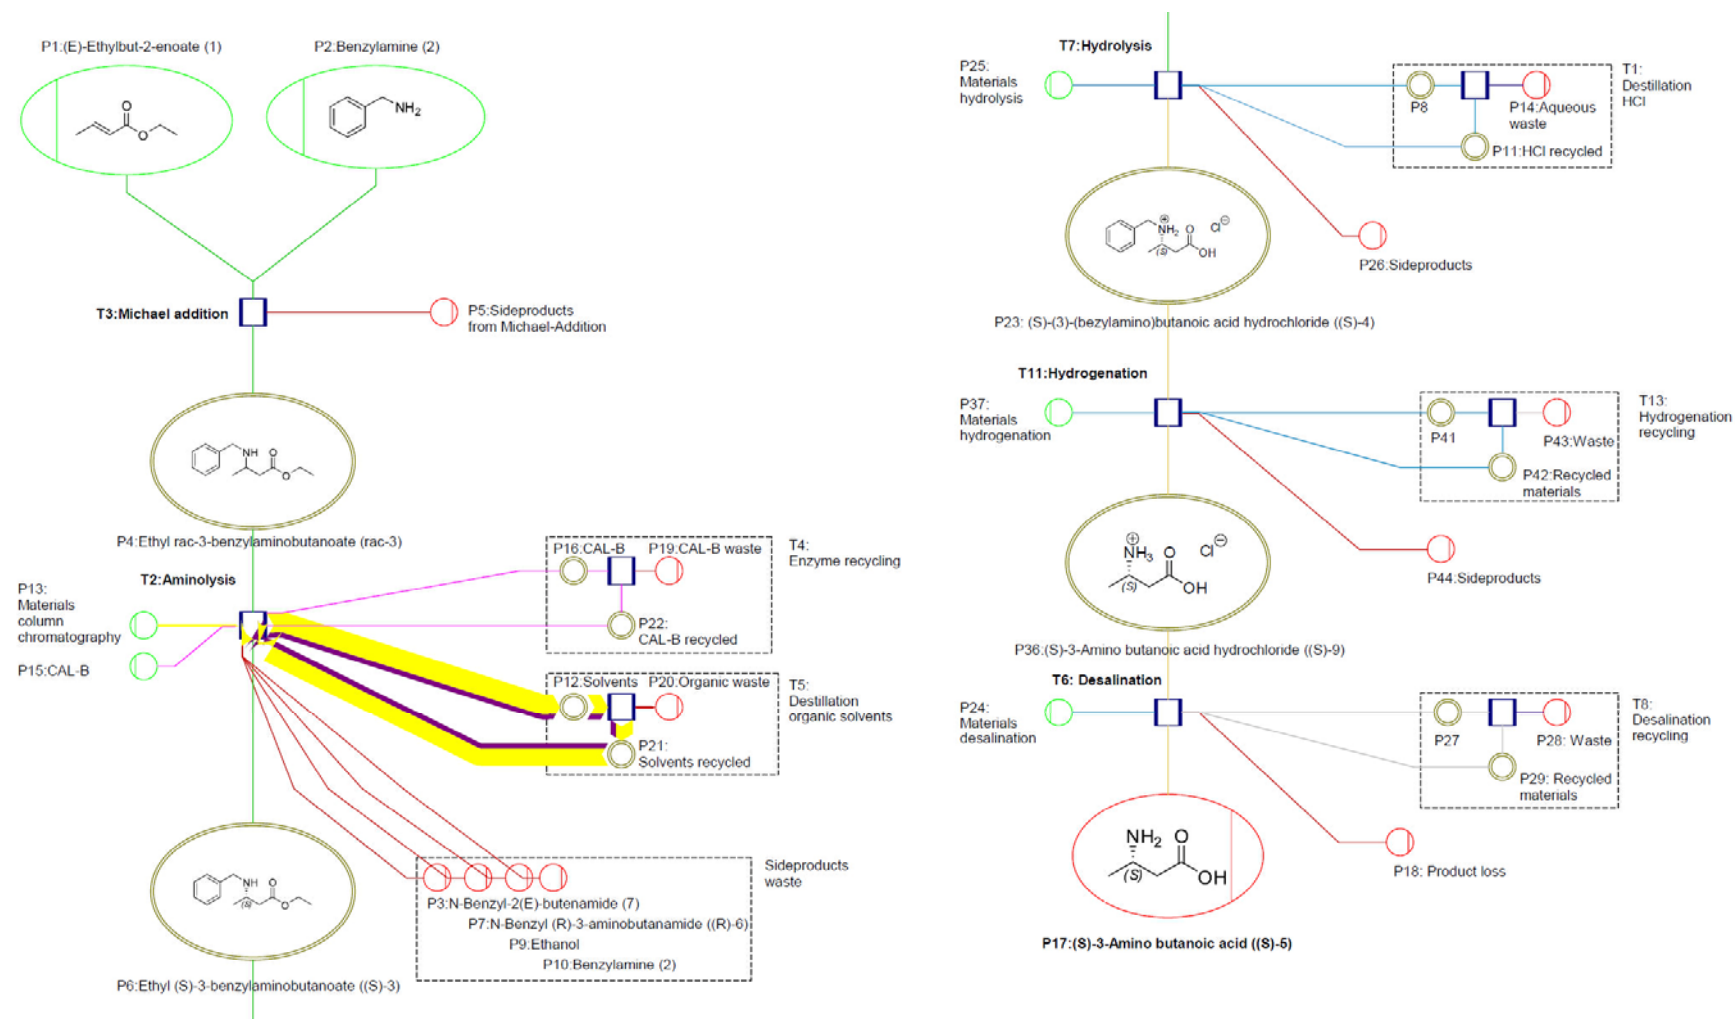

Mass flows are indicated as follows: light blue= HCl (1M aq.), dark blue= water, grey= NaOH (1M aq.), Ammonia (1M aq.), purple= auxiliary materials, yellow= organic solvents, pink= enzyme, green= (organic) material transfer, red= (organic) waste transfer.

- Mass indices (in Kg) and PEI indices (in PEI/Kg) for the input materials

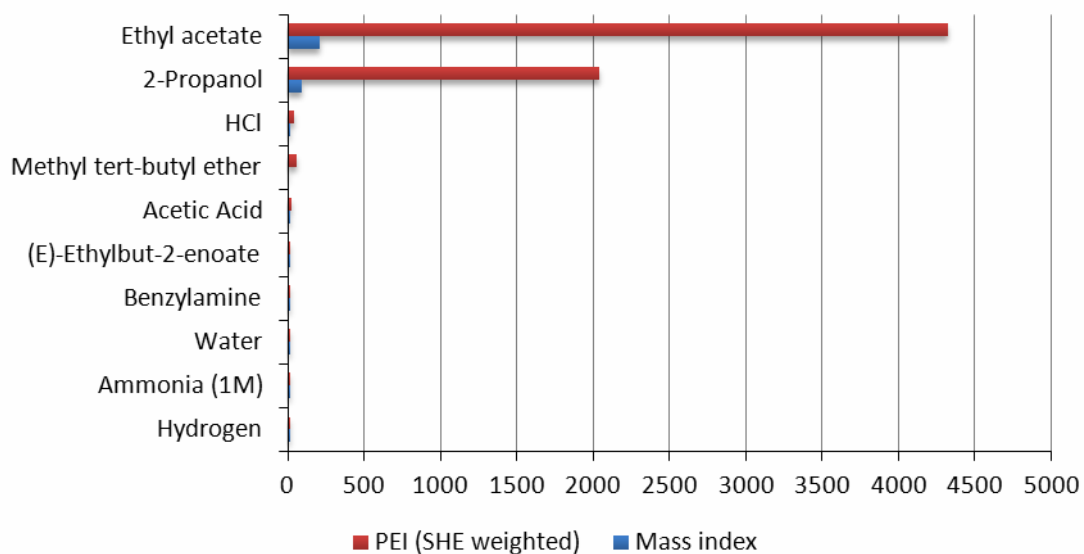

- Mass indices (in Kg) and PEI indices (in PEI/Kg) for the output materials

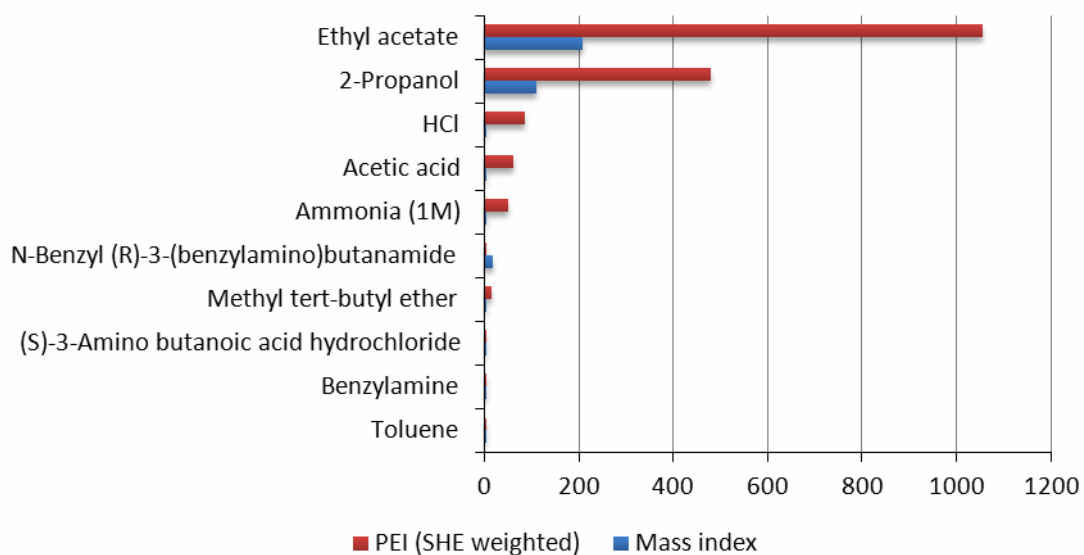

- Impact categories (input materials)

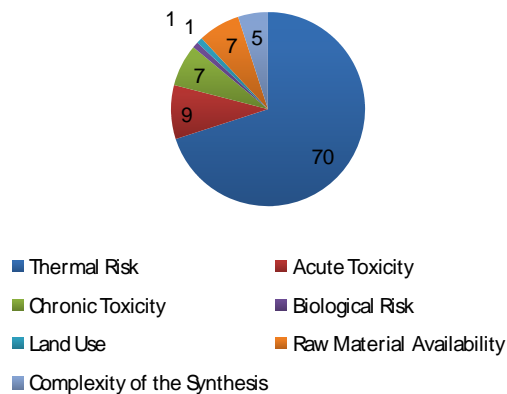

- Impact categories (output materials)

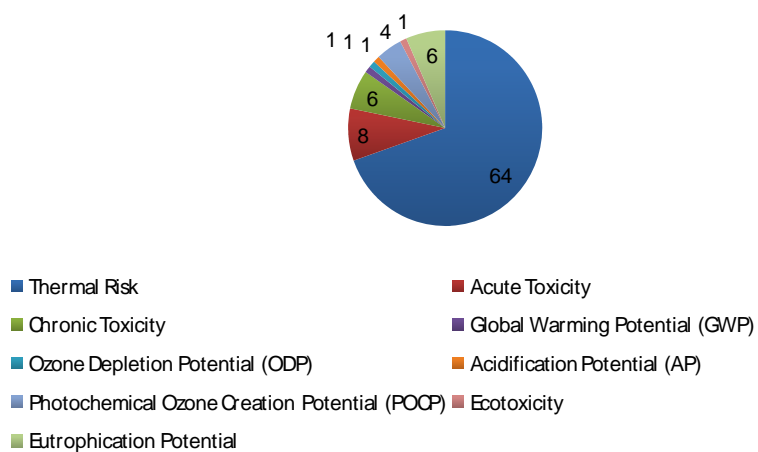

Supplement: c002721a.pdf [file c002721a.pdf]
